# Supplementary material
Source: HighWire-hosted journal article supplement (https://gh.bmj.com/content/7/12/e010553)
Supplement: inline-supplementary-material-2 [file inline-supplementary-material-2.pdf]

Supplementary Table 1. Country status of asbestos ban and mesothelioma identification, year of ban, and GBD-estimated age-adjusted mortality rate (MR) during all years before ban in 198 countries<sup>1)</sup>

|                                           | Country                      | Code | Year of ban | First year of mesothelioma identification | GBD-estimated MR of mesothelioma during all years before ban (deaths per million per year) |
|-------------------------------------------|------------------------------|------|-------------|-------------------------------------------|--------------------------------------------------------------------------------------------|
| <b>Banned &amp; Identified (N=48)</b>     |                              |      |             |                                           |                                                                                            |
| 1                                         | 1 Argentina                  | ARG  | 2001        | 1997                                      | 2-63                                                                                       |
| 2                                         | 2 Australia                  | AUS  | 2003        | 1998                                      | 18-78                                                                                      |
| 3                                         | 3 Bahrain                    | BHR  | 1996        | 1998                                      | 1-68                                                                                       |
| 4                                         | 4 Belgium                    | BEL  | 1998        | 1998                                      | 10-36                                                                                      |
| 5                                         | 5 Brunei Darussalam          | BRN  | 1994        | 2012                                      | 3-18                                                                                       |
| 6                                         | 6 Bulgaria                   | BGR  | 2005        | 2005                                      | 0-86                                                                                       |
| 7                                         | 7 Canada                     | CAN  | 2018        | 2000                                      | 9-24                                                                                       |
| 8                                         | 8 Chile                      | CHL  | 2001        | 1997                                      | 3-40                                                                                       |
| 9                                         | 9 Colombia                   | COL  | 2019        | 1997                                      | 1-76                                                                                       |
| 10                                        | 10 Croatia                   | HRV  | 2005        | 1995                                      | 4-05                                                                                       |
| 11                                        | 11 Cyprus                    | CYP  | 2005        | 2004                                      | 10-07                                                                                      |
| 12                                        | 12 Czechia                   | CZE  | 2005        | 1994                                      | 2-75                                                                                       |
| 13                                        | 13 Egypt                     | EGY  | 2005        | 2001                                      | 0-53                                                                                       |
| 14                                        | 14 Estonia                   | EST  | 2005        | 1997                                      | 1-53                                                                                       |
| 15                                        | 15 Finland                   | FIN  | 1992        | 1996                                      | 8-75                                                                                       |
| 16                                        | 16 France                    | FRA  | 1996        | 2000                                      | 10-05                                                                                      |
| 17                                        | 17 Germany                   | DEU  | 1993        | 1998                                      | 7-87                                                                                       |
| 18                                        | 18 Greece                    | GRC  | 2005        | 2014                                      | 3-75                                                                                       |
| 19                                        | 19 Hungary                   | HUN  | 2005        | 1996                                      | 2-25                                                                                       |
| 20                                        | 20 Iraq                      | IRQ  | 2016        | 2008                                      | 3-27                                                                                       |
| 21                                        | 21 Ireland                   | IRE  | 2000        | 2007                                      | 7-83                                                                                       |
| 22                                        | 22 Israel                    | ISR  | 2011        | 1998                                      | 4-26                                                                                       |
| 23                                        | 23 Italy                     | ITA  | 1992        | 2003                                      | 12-65                                                                                      |
| 24                                        | 24 Japan                     | JPN  | 2004        | 1995                                      | 3-54                                                                                       |
| 25                                        | 25 Jordan                    | JOR  | 2005        | 2012                                      | 3-02                                                                                       |
| 26                                        | 26 Kuwait                    | KWT  | 1995        | 2007                                      | 1-06                                                                                       |
| 27                                        | 27 Latvia                    | LVA  | 2001        | 1996                                      | 2-09                                                                                       |
| 28                                        | 28 Lithuania                 | LTU  | 2005        | 1998                                      | 3-08                                                                                       |
| 29                                        | 29 Luxembourg                | LUX  | 2002        | 1998                                      | 8-16                                                                                       |
| 30                                        | 30 Malta                     | MLT  | 2005        | 1996                                      | 8-31                                                                                       |
| 31                                        | 31 Netherlands               | NLD  | 1991        | 1996                                      | 18-20                                                                                      |
| 32                                        | 32 New Zealand               | NZL  | 2002        | 2000                                      | 13-37                                                                                      |
| 33                                        | 33 North Macedonia           | MKD  | 2014        | 2006                                      | 0-83                                                                                       |
| 34                                        | 34 Oman                      | OMN  | 2008        | 2014                                      | 4-06                                                                                       |
| 35                                        | 35 Poland                    | POL  | 1997        | 1999                                      | 1-64                                                                                       |
| 36                                        | 36 Portugal                  | PRT  | 2005        | 2002                                      | 1-87                                                                                       |
| 37                                        | 37 Qatar                     | QAT  | 2010        | 2012                                      | 0-86                                                                                       |
| 38                                        | 38 Republic of Korea         | KOR  | 2009        | 1995                                      | 1-34                                                                                       |
| 39                                        | 39 Romania                   | ROU  | 2005        | 1999                                      | 1-93                                                                                       |
| 40                                        | 40 Saudi Arabia              | SAU  | 1998        | 2009                                      | 0-54                                                                                       |
| 41                                        | 41 Serbia                    | SRB  | 2011        | 1998                                      | 2-17                                                                                       |
| 42                                        | 42 Slovakia                  | SVK  | 2005        | 1994                                      | 1-86                                                                                       |
| 43                                        | 43 Slovenia                  | SVN  | 1996        | 1997                                      | 4-52                                                                                       |
| 44                                        | 44 South Africa              | ZAF  | 2008        | 1996                                      | 8-68                                                                                       |
| 45                                        | 45 Spain                     | ESP  | 2002        | 1999                                      | 5-06                                                                                       |
| 46                                        | 46 Turkey                    | TUR  | 2010        | 2009                                      | 9-16                                                                                       |
| 47                                        | 47 United Kingdom            | GBR  | 1999        | 2001                                      | 19-70                                                                                      |
| 48                                        | 48 Uruguay                   | URY  | 2002        | 1997                                      | 2-19                                                                                       |
| <b>Banned &amp; Not-identified (N=6)</b>  |                              |      |             |                                           |                                                                                            |
| 49                                        | 1 Algeria                    | DZA  | 2009        | NA                                        | 0-50                                                                                       |
| 50                                        | 2 Djibouti                   | DJI  | 1999        | NA                                        | 2-24                                                                                       |
| 51                                        | 3 Honduras                   | HND  | 2004        | NA                                        | 2-11                                                                                       |
| 52                                        | 4 Monaco                     | MCO  | 2016        | NA                                        | 10-05                                                                                      |
| 53                                        | 5 Mozambique                 | MOZ  | 2010        | NA                                        | 2-39                                                                                       |
| 54                                        | 6 Taiwan (Province of China) | TWN  | 2010        | NA                                        | 1-64                                                                                       |
| <b>Not-banned &amp; Identified (N=54)</b> |                              |      |             |                                           |                                                                                            |
| 55                                        | 1 Armenia                    | ..   | NA          | 2006                                      | 7-97                                                                                       |
| 56                                        | 2 Bahamas                    | ..   | NA          | 2001                                      | 2-52                                                                                       |
| 57                                        | 3 Barbados                   | ..   | NA          | 2003                                      | 2-04                                                                                       |
| 58                                        | 4 Belarus                    | ..   | NA          | 2018                                      | 3-71                                                                                       |
| 59                                        | 5 Belize                     | ..   | NA          | 1997                                      | 4-83                                                                                       |
| 60                                        | 6 Bermuda                    | ..   | NA          | 1998                                      | 6-67                                                                                       |

|                                               |    |                                       |    |    |      |       |
|-----------------------------------------------|----|---------------------------------------|----|----|------|-------|
| 61                                            | 7  | Bolivia                               | .. | NA | 2000 | 3-80  |
| 62                                            | 8  | Bosnia and Herzegovina                | .. | NA | 2011 | 1-84  |
| 63                                            | 9  | Brazil                                | .. | NA | 1996 | 3-98  |
| 64                                            | 10 | Costa Rica                            | .. | NA | 1997 | 1-08  |
| 65                                            | 11 | Cuba                                  | .. | NA | 2001 | 1-38  |
| 66                                            | 12 | Dominica                              | .. | NA | 2014 | 3-16  |
| 67                                            | 13 | Dominican Republic                    | .. | NA | 1996 | 0-94  |
| 68                                            | 14 | Ecuador                               | .. | NA | 1998 | 1-59  |
| 69                                            | 15 | El Salvador                           | .. | NA | 2000 | 0-44  |
| 70                                            | 16 | Fiji                                  | .. | NA | 2008 | 2-27  |
| 71                                            | 17 | Georgia                               | .. | NA | 1998 | 1-35  |
| 72                                            | 18 | Grenada                               | .. | NA | 2004 | 4-06  |
| 73                                            | 19 | Guatemala                             | .. | NA | 2006 | 0-88  |
| 74                                            | 20 | Guyana                                | .. | NA | 2004 | 3-63  |
| 75                                            | 21 | Iran (Islamic Republic of)            | .. | NA | 2013 | 0-49  |
| 76                                            | 22 | Jamaica                               | .. | NA | 2000 | 2-08  |
| 77                                            | 23 | Kazakhstan                            | .. | NA | 2013 | 4-62  |
| 78                                            | 24 | Kyrgyzstan                            | .. | NA | 2000 | 0-89  |
| 79                                            | 25 | Lebanon                               | .. | NA | 2017 | 0-50  |
| 80                                            | 26 | Libya                                 | .. | NA | 2016 | 0-63  |
| 81                                            | 27 | Malaysia                              | .. | NA | 2000 | 0-94  |
| 82                                            | 28 | Maldives                              | .. | NA | 2011 | 4-26  |
| 83                                            | 29 | Mauritius                             | .. | NA | 2008 | 0-87  |
| 84                                            | 30 | Mexico                                | .. | NA | 1998 | 2-76  |
| 85                                            | 31 | Mongolia                              | .. | NA | 2016 | 1-79  |
| 86                                            | 32 | Montenegro                            | .. | NA | 2000 | 1-24  |
| 87                                            | 33 | Morocco                               | .. | NA | 2000 | 0-53  |
| 88                                            | 34 | Nicaragua                             | .. | NA | 1998 | 0-86  |
| 89                                            | 35 | Palestine                             | .. | NA | 2008 | 0-60  |
| 90                                            | 36 | Panama                                | .. | NA | 1998 | 1-03  |
| 91                                            | 37 | Paraguay                              | .. | NA | 1997 | 1-69  |
| 92                                            | 38 | Peru                                  | .. | NA | 1999 | 3-64  |
| 93                                            | 39 | Philippines                           | .. | NA | 1999 | 1-29  |
| 94                                            | 40 | Puerto Rico                           | .. | NA | 1999 | 2-01  |
| 95                                            | 41 | Republic of Moldova                   | .. | NA | 1996 | 1-11  |
| 96                                            | 42 | Saint Kitts and Nevis                 | .. | NA | 2004 | 6-82  |
| 97                                            | 43 | Saint Lucia                           | .. | NA | 2008 | 2-00  |
| 98                                            | 44 | Singapore                             | .. | NA | 2012 | 4-72  |
| 99                                            | 45 | Sri Lanka                             | .. | NA | 2006 | 2-43  |
| 100                                           | 46 | Suriname                              | .. | NA | 2009 | 1-78  |
| 101                                           | 47 | Thailand                              | .. | NA | 2012 | 2-52  |
| 102                                           | 48 | Trinidad and Tobago                   | .. | NA | 1999 | 1-50  |
| 103                                           | 49 | Tunisia                               | .. | NA | 2009 | 0-46  |
| 104                                           | 50 | United Arab Emirates                  | .. | NA | 2019 | 0-65  |
| 105                                           | 51 | United States of America              | .. | NA | 1999 | 6-29  |
| 106                                           | 52 | United States Virgin Islan            | .. | NA | 2000 | 5-65  |
| 107                                           | 53 | Uzbekistan                            | .. | NA | 2004 | 1-12  |
| 108                                           | 54 | Venezuela                             | .. | NA | 1996 | 1-15  |
| <b>Not-banned &amp; Not-identified (N=90)</b> |    |                                       |    |    |      |       |
| 109                                           | 1  | Afghanistan                           | .. | NA | NA   | 1-10  |
| 110                                           | 2  | Albania                               | .. | NA | NA   | 1-23  |
| 111                                           | 3  | American Samoa                        | .. | NA | NA   | 3-15  |
| 112                                           | 4  | Andorra                               | .. | NA | NA   | 16-38 |
| 113                                           | 5  | Angola                                | .. | NA | NA   | 2-24  |
| 114                                           | 6  | Antigua and Barbuda                   | .. | NA | NA   | 1-08  |
| 115                                           | 7  | Azerbaijan                            | .. | NA | NA   | 1-09  |
| 116                                           | 8  | Bangladesh                            | .. | NA | NA   | 1-50  |
| 117                                           | 9  | Benin                                 | .. | NA | NA   | 1-27  |
| 118                                           | 10 | Bhutan                                | .. | NA | NA   | 1-77  |
| 119                                           | 11 | Botswana                              | .. | NA | NA   | 9-85  |
| 120                                           | 12 | Burkina Faso                          | .. | NA | NA   | 1-09  |
| 121                                           | 13 | Burundi                               | .. | NA | NA   | 2-44  |
| 122                                           | 14 | Cabo Verde                            | .. | NA | NA   | 0-55  |
| 123                                           | 15 | Cambodia                              | .. | NA | NA   | 1-71  |
| 124                                           | 16 | Cameroon                              | .. | NA | NA   | 1-75  |
| 125                                           | 17 | Central African Republic              | .. | NA | NA   | 2-96  |
| 126                                           | 18 | Chad                                  | .. | NA | NA   | 1-09  |
| 127                                           | 19 | China                                 | .. | NA | NA   | 1-37  |
| 128                                           | 20 | Comoros                               | .. | NA | NA   | 2-26  |
| 129                                           | 21 | Congo                                 | .. | NA | NA   | 3-17  |
| 130                                           | 22 | Cook Islands                          | .. | NA | NA   | 1-58  |
| 131                                           | 23 | Cte d'Ivoire                          | .. | NA | NA   | 1-46  |
| 132                                           | 24 | Democratic People's Republic of Korea | .. | NA | NA   | 1-68  |

|     |    |                                  |    |    |    |       |
|-----|----|----------------------------------|----|----|----|-------|
| 133 | 25 | Democratic Republic of the Congo | .. | NA | NA | 2-18  |
| 134 | 26 | Equatorial Guinea                | .. | NA | NA | 2-24  |
| 135 | 27 | Eritrea                          | .. | NA | NA | 3-02  |
| 136 | 28 | Eswatini                         | .. | NA | NA | 11-87 |
| 137 | 29 | Ethiopia                         | .. | NA | NA | 2-35  |
| 138 | 30 | Gabon                            | .. | NA | NA | 3-00  |
| 139 | 31 | Gambia                           | .. | NA | NA | 1-22  |
| 140 | 32 | Ghana                            | .. | NA | NA | 1-81  |
| 141 | 33 | Greenland                        | .. | NA | NA | 9-24  |
| 142 | 34 | Guam                             | .. | NA | NA | 1-75  |
| 143 | 35 | Guinea                           | .. | NA | NA | 1-25  |
| 144 | 36 | Guinea-Bissau                    | .. | NA | NA | 1-89  |
| 145 | 37 | Haiti                            | .. | NA | NA | 3-39  |
| 146 | 38 | India                            | .. | NA | NA | 1-87  |
| 147 | 39 | Indonesia                        | .. | NA | NA | 1-21  |
| 148 | 40 | Kenya                            | .. | NA | NA | 2-37  |
| 149 | 41 | Kiribati                         | .. | NA | NA | 1-46  |
| 150 | 42 | Lao People's Democratic Republic | .. | NA | NA | 1-29  |
| 151 | 43 | Lesotho                          | .. | NA | NA | 13-68 |
| 152 | 44 | Liberia                          | .. | NA | NA | 1-12  |
| 153 | 45 | Madagascar                       | .. | NA | NA | 1-84  |
| 154 | 46 | Malawi                           | .. | NA | NA | 2-14  |
| 155 | 47 | Mali                             | .. | NA | NA | 1-10  |
| 156 | 48 | Marshall Islands                 | .. | NA | NA | 3-99  |
| 157 | 49 | Mauritania                       | .. | NA | NA | 1-28  |
| 158 | 50 | Micronesia (Federated Stat       | .. | NA | NA | 3-74  |
| 159 | 51 | Myanmar                          | .. | NA | NA | 1-72  |
| 160 | 52 | Namibia                          | .. | NA | NA | 12-66 |
| 161 | 53 | Nauru                            | .. | NA | NA | 3-03  |
| 162 | 54 | Nepal                            | .. | NA | NA | 1-57  |
| 163 | 55 | Niger                            | .. | NA | NA | 0-97  |
| 164 | 56 | Nigeria                          | .. | NA | NA | 0-86  |
| 165 | 57 | Niue                             | .. | NA | NA | 1-97  |
| 166 | 58 | Northern Mariana Islands         | .. | NA | NA | 1-35  |
| 167 | 59 | Pakistan                         | .. | NA | NA | 1-51  |
| 168 | 60 | Palau                            | .. | NA | NA | 1-72  |
| 169 | 61 | Papua New Guinea                 | .. | NA | NA | 2-06  |
| 170 | 62 | Russian Federation               | .. | NA | NA | 2-89  |
| 171 | 63 | Rwanda                           | .. | NA | NA | 2-81  |
| 172 | 64 | Saint Vincent and the Gren       | .. | NA | NA | 1-90  |
| 173 | 65 | Samoa                            | .. | NA | NA | 2-16  |
| 174 | 66 | San Marino                       | .. | NA | NA | 8-34  |
| 175 | 67 | Sao Tome and Principe            | .. | NA | NA | 1-02  |
| 176 | 68 | Senegal                          | .. | NA | NA | 1-40  |
| 177 | 69 | Seychelles                       | .. | NA | NA | 1-61  |
| 178 | 70 | Sierra Leone                     | .. | NA | NA | 1-06  |
| 179 | 71 | Solomon Islands                  | .. | NA | NA | 3-14  |
| 180 | 72 | Somalia                          | .. | NA | NA | 2-17  |
| 181 | 73 | South Sudan                      | .. | NA | NA | 1-63  |
| 182 | 74 | Sudan                            | .. | NA | NA | 0-50  |
| 183 | 75 | Syrian Arab Republic             | .. | NA | NA | 0-58  |
| 184 | 76 | Tajikistan                       | .. | NA | NA | 1-57  |
| 185 | 77 | Timor-Leste                      | .. | NA | NA | 0-96  |
| 186 | 78 | Togo                             | .. | NA | NA | 1-40  |
| 187 | 79 | Tokelau                          | .. | NA | NA | 2-02  |
| 188 | 80 | Tonga                            | .. | NA | NA | 1-77  |
| 189 | 81 | Turkmenistan                     | .. | NA | NA | 2-30  |
| 190 | 82 | Tuvalu                           | .. | NA | NA | 2-47  |
| 191 | 83 | Uganda                           | .. | NA | NA | 1-92  |
| 192 | 84 | Ukraine                          | .. | NA | NA | 4-43  |
| 193 | 85 | United Republic of Tanzania      | .. | NA | NA | 2-30  |
| 194 | 86 | Vanuatu                          | .. | NA | NA | 3-35  |
| 195 | 87 | Viet Nam                         | .. | NA | NA | 1-65  |
| 196 | 88 | Yemen                            | .. | NA | NA | 0-54  |
| 197 | 89 | Zambia                           | .. | NA | NA | 2-88  |
| 198 | 90 | Zimbabwe                         | .. | NA | NA | 2-58  |

1) Six "early-banned" countries that banned asbestos in or before 1990, i.e., Austria, Denmark, Iceland, Norway, Sweden and Switzerland are precluded from this analysis and analysed separately in Table 4. See Methods for full explanaton.

See Methods for full definition of asbestos ban and mesothelioma identification.

.. : Country codes were not shown in Supplementary Figure 1; NA : Not applicable.
